# Supplementary material for: Hedgehog/Notch-induced premature gliogenesis represents a new disease mechanism for Hirschsprung disease in mice and humans
Source: JCI journal article supplement (doi:10.1172/jci43737), 2011-08-15
Supplement: sd1 [file 1]

**a**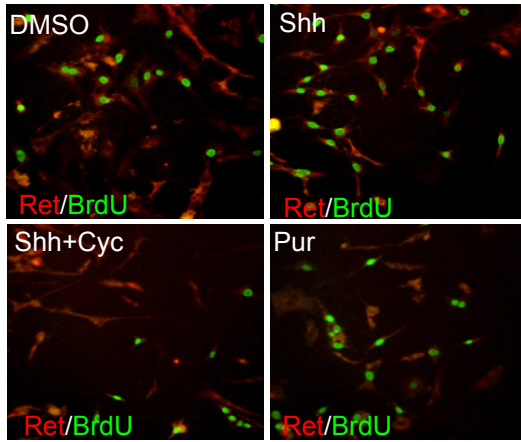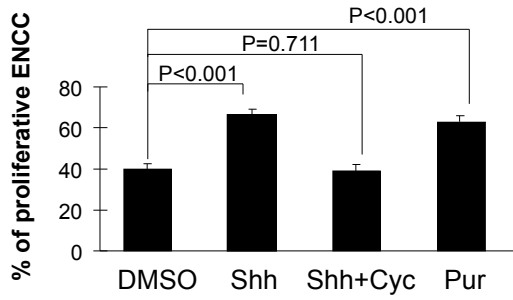**b****RT-PCR**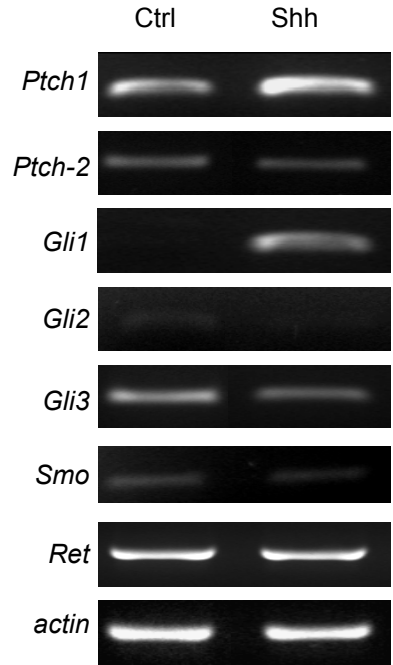**c****WB**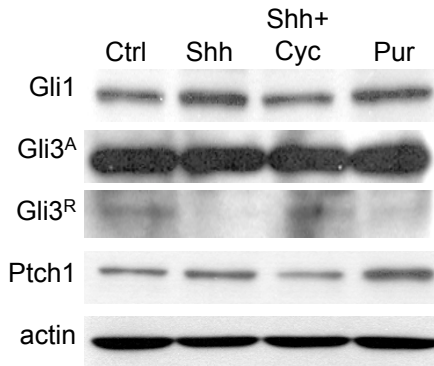**d**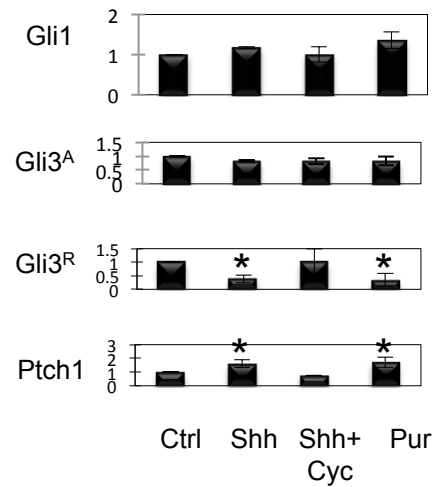

**Supplementary Figure 1. Shh promotes proliferation of ENCC by activation of Ptc-Smo-Gli pathway. (a)** BrdU proliferation assay showed that Shh significantly increases the proliferation of ENCC progenitors ( $Ret^+$ ), but not  $Tuj1^+$  and  $GFAP^+$  ENCCs (data not shown). This effect could be mimicked and counteracted by the treatments with purmorphamine (Pur,  $1\mu M$ ) and cyclopamine (Cyc,  $0.5\mu M$ ), respectively. ENCCs were treated with DMSO (vehicle control), Shh, purmorphamine (Pur) and cyclopamine (Cyc) for 3 days. BrdU (green) positive cells are proliferating. Cell proliferation rate was measured by the number of  $BrdU^+/Ret^+$  cells over total number of  $Ret^+$  cells. Bars represent the mean  $\pm$  SEM and three independent experiments were performed. **(b)** RT-PCR analysis revealed high level of *Ptch1* and *Gli3*, a moderate level of *Ptch-2* and *Smo*, a low level of *Gli1* and *Gli2* in ENCC. Shh upregulated the expressions of *Ptch1* and *Gli1*. *Ret* and  $\beta$ -actin were served as the internal control. **(c)** Western blot analysis further confirmed that both Shh and its agonist, purmorphamine (Pur), upregulated the expressions of hedgehog target genes including *Gli1* and *Ptch1*, and down-regulated the *Gli3* repressor, which could be counteracted by the addition of the antagonist, cyclopamine (Cyc). Noteworthy, like in many other tissues, up-regulation of *Gli3* activator was not observed upon the Shh and purmorphamine treatments, suggesting that it is not essential for the Shh-dependent cell proliferation. **(d)** Quantification of Western blots. Bars represent the mean  $\pm$  SEM and three independent experiments were performed. *P*-values less than 0.05 were considered to be statistically significant different from the control (\*).

### % of proliferative ENCC

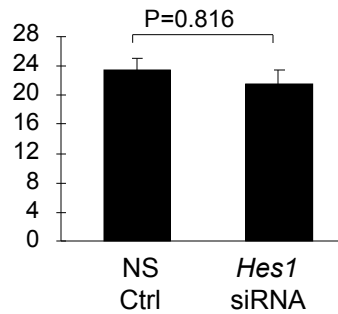

### qRT-PCR

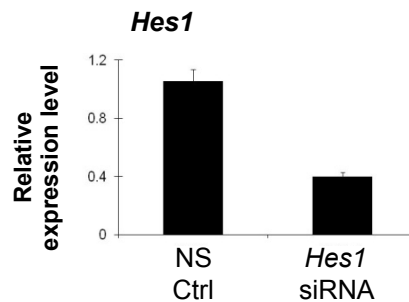

**Supplementary Figure 2. Down-regulation of *Hes1* does not affect proliferation of ENCCs.** (A) BrdU proliferation assay was performed to examine whether knockdown of *Hes1* affects the proliferation of ENCC progenitors. Proliferating cells were incorporated with BrdU and the relative proliferation rates were measured by counting proliferative ENCCs (BrdU<sup>+</sup>/Ret<sup>+</sup>) over the total number of ENCCs (Ret<sup>+</sup>). The values reported in bar charts represent the mean  $\pm$  SEM and three independent assays were performed. Data was analyzed by t-test. *P*-values less than 0.05 are statistically different from the control (Ctrl). (B) Quantitative RT-PCR on the expression of *Hes1* in ENCCs transfected with *Hes1* siRNA and non-silencing control (NS).

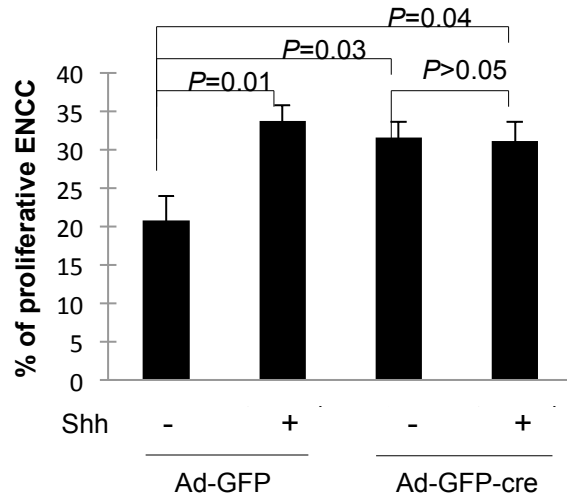

**Supplementary Figure 3. *Ptch1* deletion is sufficient to fully activate hedgehog signaling.** Relative proliferation rates were measured by counting BrdU<sup>+</sup>/Ret<sup>+</sup> and total Ret<sup>+</sup> cells. The values reported in bar charts represent the mean ± SEM and three independent assays were performed. *P*-values less than 0.05 are statistically different



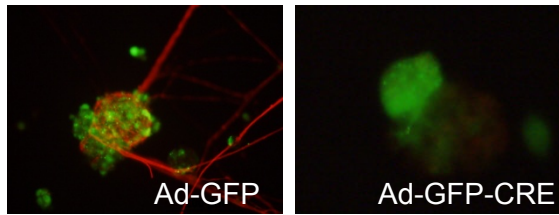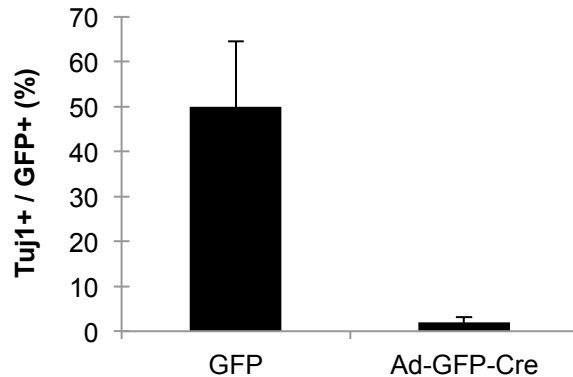

**Supplementary Figure 4. Deletion of *Ptch1* inhibits neurogenesis of ENCCs.** Immunocytochemistry: the control (Ad-GFP) and *Ptch1* deleted (Ad-GFP-CRE) cells were treated with GDNF for 10 days. **A.** Neuronal differentiation was monitored based on the expression of Neuronal Class III  $\beta$ -Tubulin (Tuj1). **B.** Percentage of neuronal precursors was measured over the total number of GFP<sup>+</sup> ENCCs. For each treatment group, a minimum of 6 random fields under 200X magnification with at least 250 cells in total was photographed for cell counting. The values reported in bar charts represent the mean  $\pm$  SEM of three wells (i.e. 18 random fields).

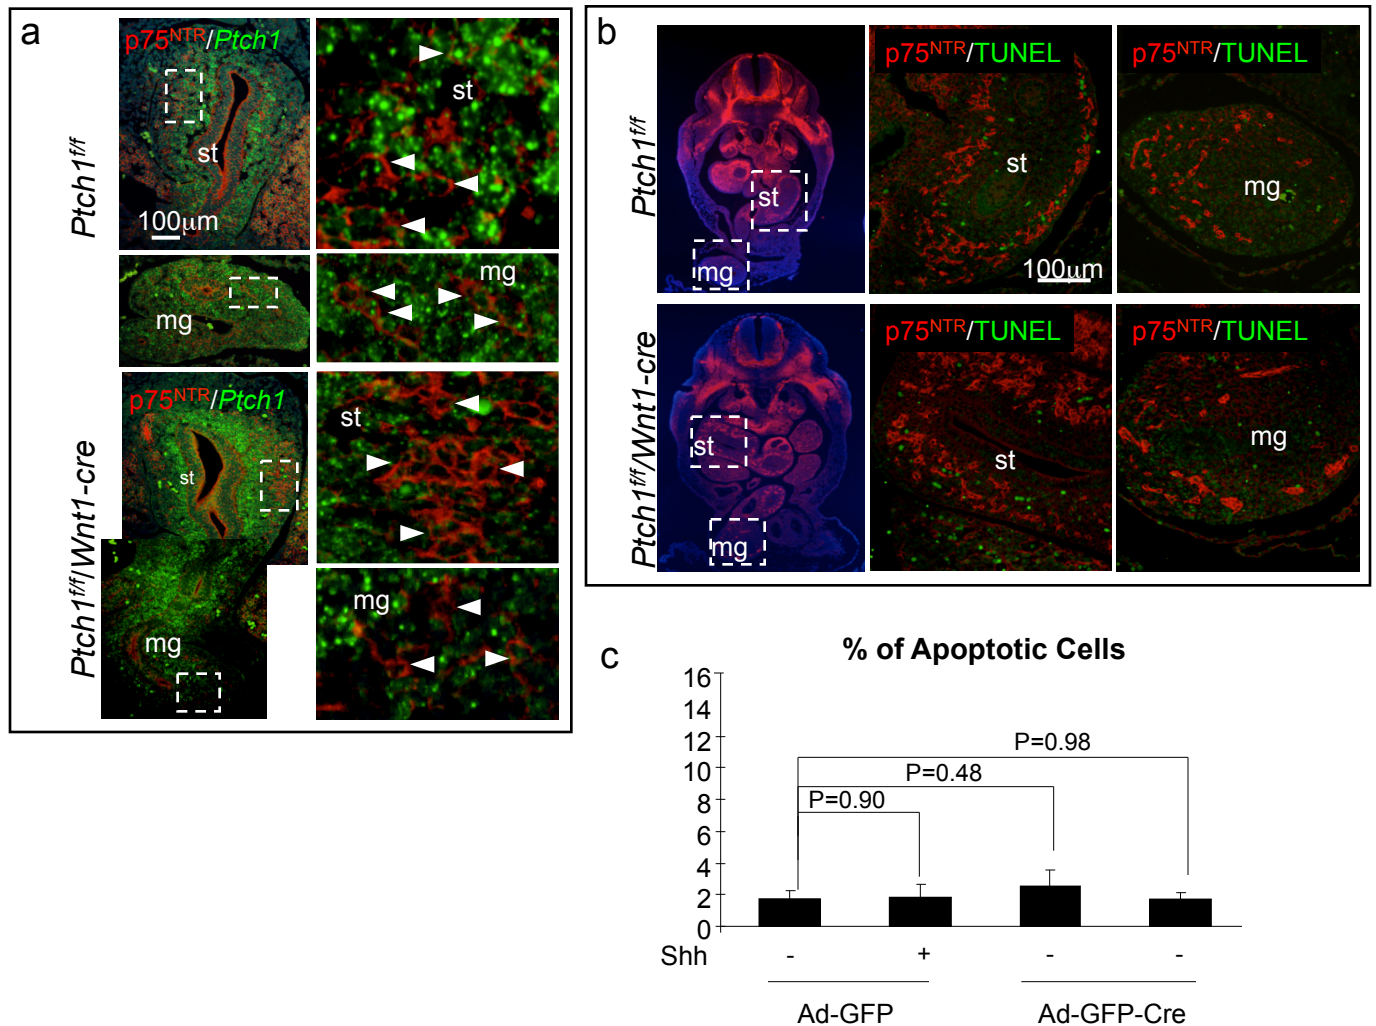

**Supplementary Figure 5. Deletion of *Ptch1* in the pre-migratory ENCCs does not affect migration and cell survival.** (a) *Ptch1*<sup>-/-</sup> ENCCs were detected in the mutant bowel (*Ptch1*<sup>f/f</sup>/*Wnt1-Cre*). Transverse section through stomach (st) and midguts (mg) of E11.5 control (*Ptch1*<sup>f/f</sup>) and *Ptch1* mutant (*Ptch1*<sup>f/f</sup>/*Wnt1-Cre*) embryos stained for *Ptch1* transcript (green dots) by *in situ* hybridization and p75<sup>NTR</sup> protein (Red) by immunostaining. *Ptch1* transcripts were expressed in the mesenchyme and the ENCC progenitors (p75<sup>NTR</sup><sup>+</sup>) in control (*Ptch1*<sup>f/f</sup>). *Ptch1* transcripts were specifically deleted in the ENCC progenitors of the mutants (*Ptch1*<sup>f/f</sup>/*Wnt1-Cre*) but remained expressed in the mesenchyme. (b) Apoptosis of ENCC progenitors in E11.5 *Ptch1*<sup>f/f</sup> and conditional *Ptch1* knockout (*Ptch1*<sup>f/f</sup>/*Wnt1-Cre*) guts were analyzed by TUNEL (green) and immunofluorescence for p75<sup>NTR</sup> (red). ENCC progenitors (p75<sup>NTR</sup><sup>+</sup>, red) undergoing apoptosis (TUNEL<sup>+</sup>, green) were rarely identified in both wildtype and mutant guts. Regions highlighted are magnified as shown either in insets (a) or on the right (b). Abbreviations: st, stomach; mg, midgut. (c) Deletion of *Ptch1* in ENCCs did not induce apoptosis. TUNEL assay was performed with *Ptch1*<sup>f/f</sup> ENCCs transduced with adenovirus expressing Cre recombinase (Ad-GFP-Cre) or control virus (Ad-GFP). Error bars indicated ± SEM across experimental replicates and three independent experiments were performed.

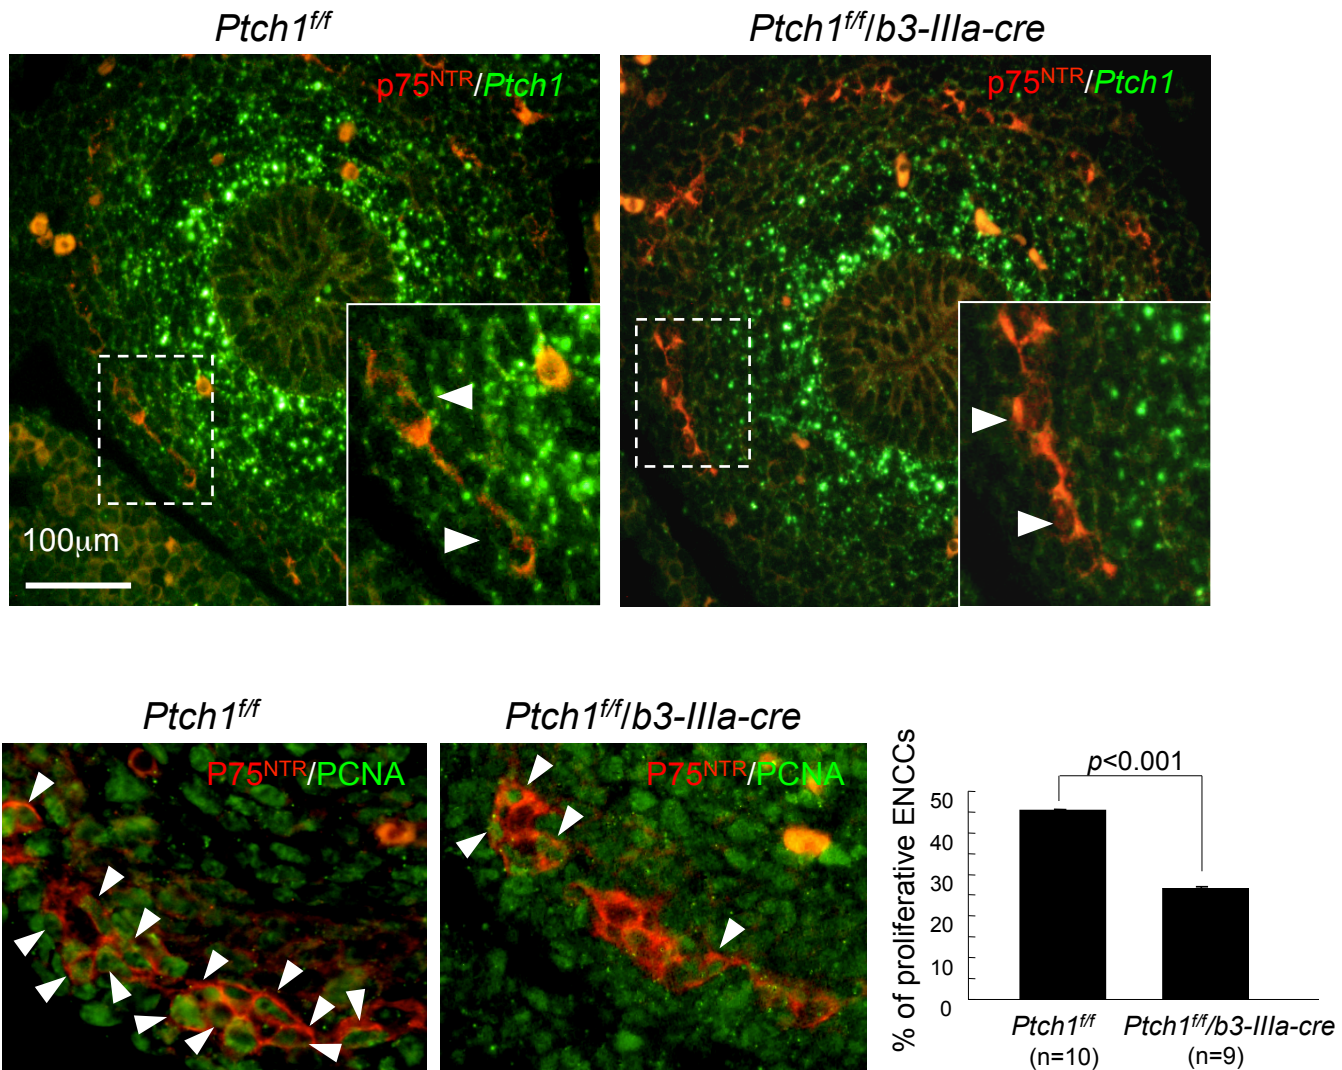

**Supplementary Figure 6. Neural crest specific deletion of *Ptch1* in the *Ptch1<sup>ff/ff</sup>/b3-IIIa-Cre* mouse embryonic guts.** (A) Transverse section of E12.5 control (*Ptch1<sup>ff/ff</sup>*) and *Ptch1* mutant (*Ptch1<sup>ff/ff</sup>/b3-IIIa-Cre*) embryos stained for *Ptch1* transcript (green dots) by *in situ* hybridization and p75<sup>NTR</sup> protein (Red) by immunostaining. *Ptch1* transcripts were expressed in the mesenchyme and the ENCC progenitors (p75<sup>NTR</sup><sup>+</sup>) in control (*Ptch1<sup>ff/ff</sup>*). *Ptch1* transcripts were specifically deleted in the ENCC progenitors of the mutants (*Ptch1<sup>ff/ff</sup>/b3-IIIa-Cre*) but remained expressed in the mesenchyme. (*Ptch1* negative ENCCs were found in the *Ptch1<sup>ff/ff</sup>/b3-IIIa-Cre* embryos (arrowheads). Regions highlighted are magnified and shown as insets. (B) Proliferation of ENS progenitors in E12.5 control (*Ptch1<sup>ff/ff</sup>*) and conditional *Ptch1* knockout (*Ptch1<sup>ff/ff</sup>/b3-IIIa-Cre*) guts were analyzed by immunofluorescence for PCNA (green) and p75<sup>NTR</sup> (red). Proliferating ENCCs (p75<sup>NTR</sup><sup>+</sup>, PCNA<sup>+</sup>, arrowheads) and non-proliferating ENCCs (p75<sup>NTR</sup><sup>+</sup>, PCNA<sup>-</sup>) were identified and counted in control and mutant guts. The percentages of proliferative ENCCs in control and mutant guts were calculated and shown in bar-chart. Error bars indicated  $\pm$  SEM across 10 control (*Ptch1<sup>ff/ff</sup>*) and 9 mutant (*Ptch1<sup>ff/ff</sup>/b3-IIIa-Cre*) mice.

**A**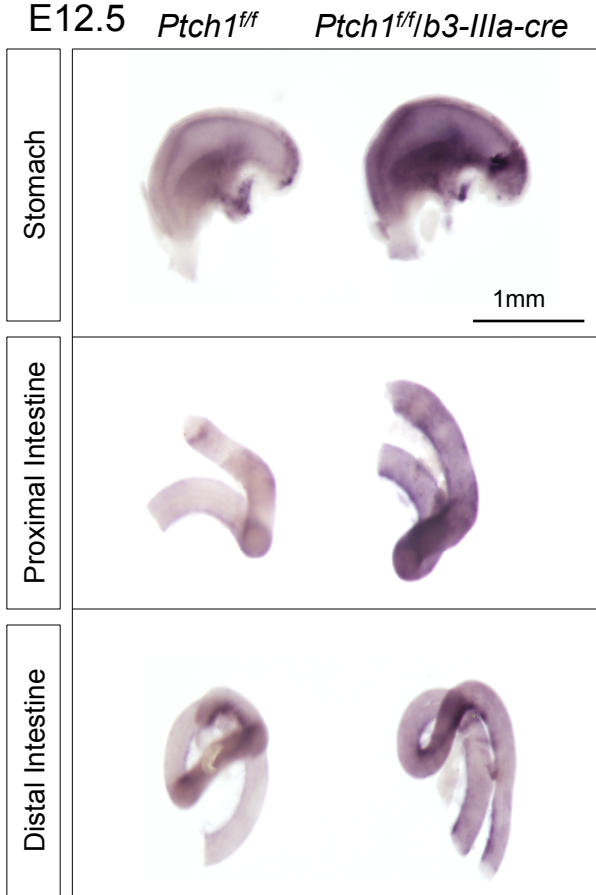**B**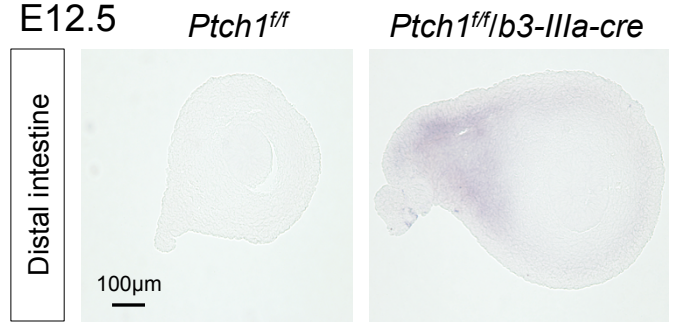

**Supplementary Figure 7. Early detection of glial marker (*Fabp7*) in the *Ptch1<sup>ff</sup>/b3-IIIa-Cre* mutants.** *In situ* hybridization was used to examine the expression of glial marker (*FABP7*) on E12.5 control (*Ptch1<sup>ff</sup>*) and conditional *Ptch1* knockout (*Ptch1<sup>ff</sup>/b3-IIIa-Cre*) guts. **(A)** The whole mount of the E12.5 control and *Ptch1* mutant bowels stained with *FABP7*. **(B)** Transverse sections of the E12.5 control and *Ptch1* mutant bowels stained with *FABP7*.



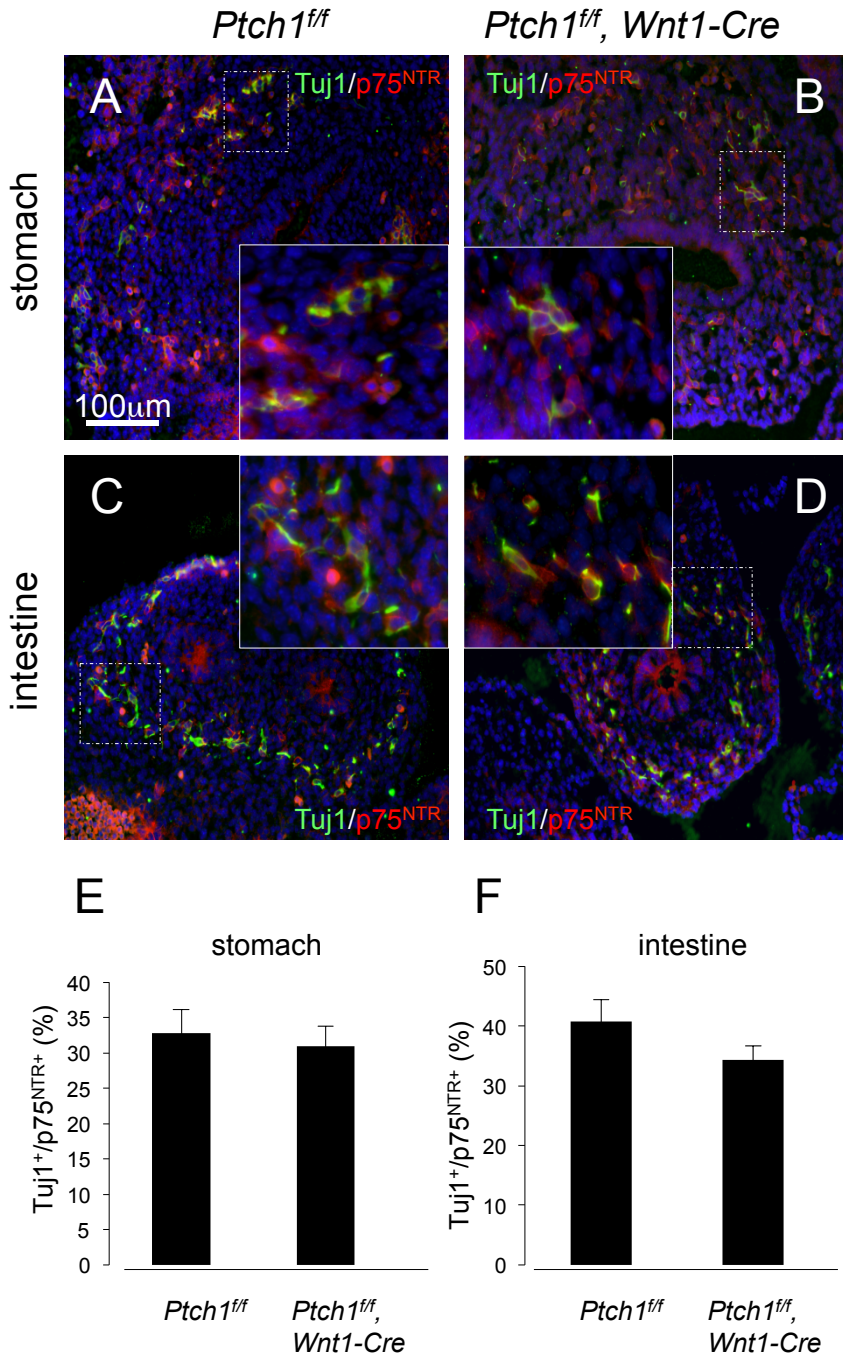

**Supplementary Figure 8. No significant change in neuronal differentiation between control and *Ptch1* mutants.** Immunohistochemical analysis of E11.5 control (A & C) and *Ptch1* mutant (*Ptch1<sup>ff</sup>/Wnt1-Cre*) (B & D) mouse embryos with anti-TuJ1 (green) and anti-p75<sup>NTR</sup> (red) antibodies. Regions highlighted are magnified as shown in insets. Average percentages of TuJ1<sup>+</sup> cells were measured by counting number of TuJ1<sup>+</sup> cells over the total number of ENCCs (p75<sup>NTR+</sup>) and data is shown with mean ± SEM (E & F). More than four sections from stomach or intestine regions of three different embryos were counted. Number of p75<sup>NTR+</sup> ENCCs and the percentages of TuJ1<sup>+</sup> cells in controls and mutants were comparable.

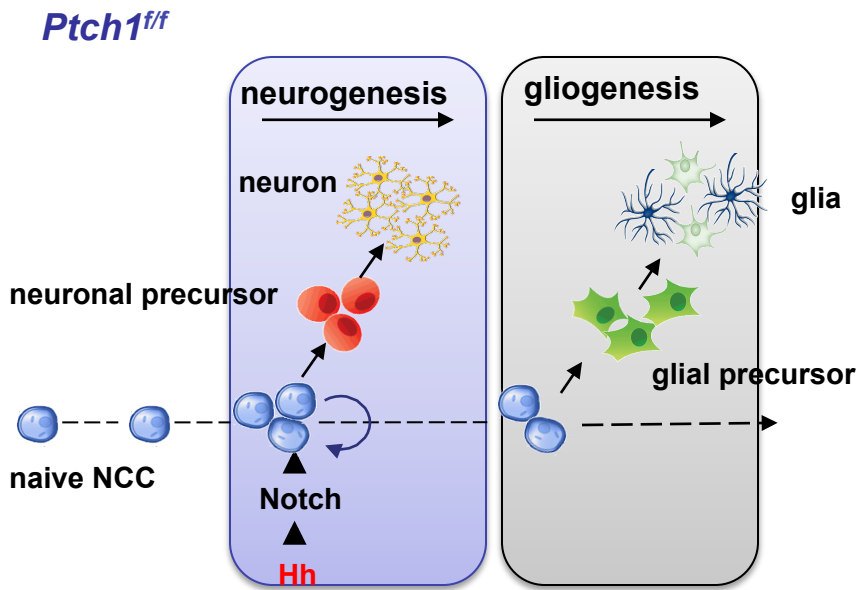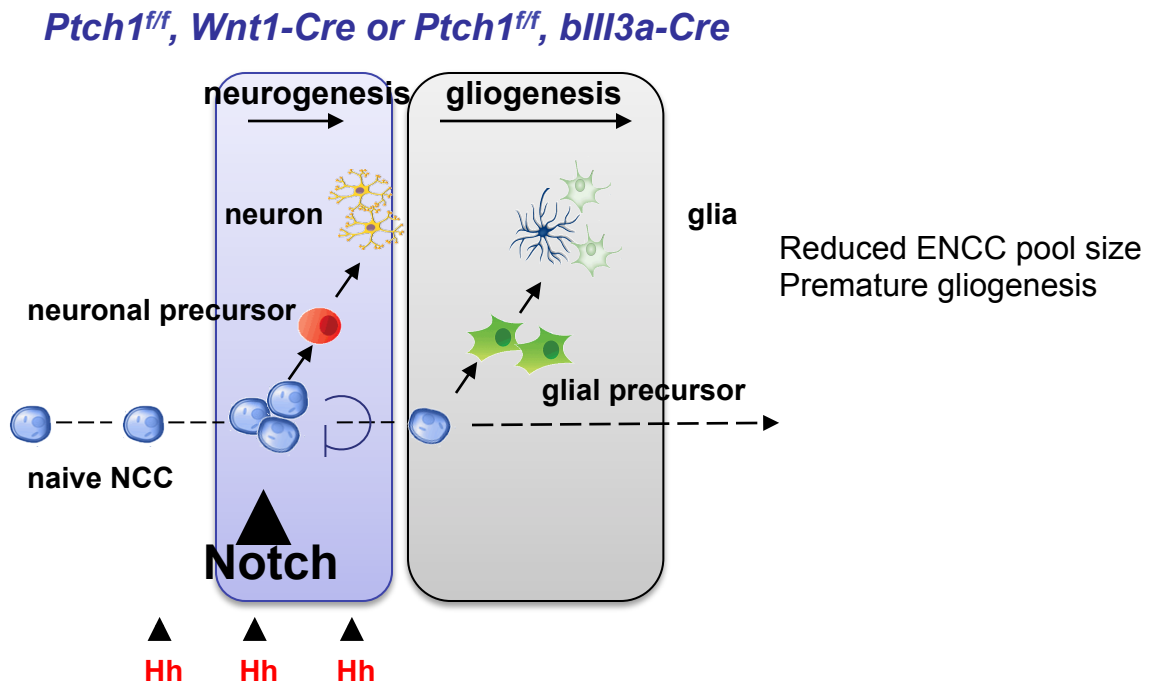

**Supplementary Figure 9. Schematic diagram summarizes the potential functional interaction between Notch and Hh signalings during ENS development.** Developmental process involves sequential waves of neurogenesis and gliogenesis, and requires an appropriate balance between the proliferation and differentiation of ENCCs and their progeny. Hh-Notch pathway mediates the pool size of ENCC progenitors by controlling their proliferation and switching neurogenesis to gliogenesis. Constitutive activation of Hh pathway in *Ptch1* mutant ENCCs results in robust induction of Notch signaling, leading to premature switch from neurogenesis to gliogenesis. Early ENCC differentiation may limit the expansion of ENCCs and result in a reduced ENCC pool size.

**Supplementary table 1: Genes and number of SNPs in the two signaling gene sets**

| Pathway | Gene          | Chromosome | Total length (bp) | No. of SNPs* |
|---------|---------------|------------|-------------------|--------------|
| HH      | <i>SHH</i>    | 7q36       | 9,410             | 2            |
|         | <i>PTCH1</i>  | 9q22.32    | 73,986            | 12           |
|         | <i>GLI1</i>   | 12q13.3    | 12,112            | 3            |
|         | <i>GLI2</i>   | 2q14       | 199,330           | 9            |
|         | <i>GLI3</i>   | 7p14       | 276,070           | 22           |
|         | <i>SMO</i>    | 7q32       | 24,674            | 6            |
|         | <i>SUFU</i>   | 10q24.32   | 129,446           | 6            |
| NOTCH   | <i>NOTCH1</i> | 9q34       | 51,419            | 5            |
|         | <i>NOTCH2</i> | 6q27       | 8,404             | 3            |
|         | <i>NOTCH3</i> | 19p13.12   | 41,349            | 4            |
|         | <i>DLL1</i>   | 6q27       | 8,404             | 5            |
|         | <i>DLL3</i>   | 19q13.2    | 9,565             | 4            |
|         | <i>DLL4</i>   | 15q14      | 9,690             | 4            |
|         | <i>JAG1</i>   | 20p12.1    | 36,363            | 7            |
|         | <i>JAG2</i>   | 14q32.33   | 27,086            | 3            |
|         | <i>MASH1</i>  | 12q23.2    | 2,843             | 1            |
|         | <i>HES1</i>   | 3q29       | 2,440             | 7            |

\* The SNP marker sets per gene were selected from the Affymetrix genotypes on basis of the linkage disequilibrium (LD) within the gene region. SNPs in perfect LD ( $r^2 \geq 0.5$ ) were dropped from the analysis to avoid redundancy and minimize for multiple testing correction.

**Supplementary Table 2: Differences in the first canonical correlation between case and controls**

| <i>NOTCH</i> \ <i>SHH</i> | <i>SHH</i> | <i>PTCH1</i> | <i>SMO</i> | <i>GLI1</i> | <i>GLI2</i> | <i>GLI3</i> | <i>SUFU</i> |
|---------------------------|------------|--------------|------------|-------------|-------------|-------------|-------------|
| <i>NOTCH1</i>             | 0.142      | 0.126        | 0.114      | 0.090       | 0.177       | 0.145       | 0.098       |
| <i>NOTCH2</i>             | 0.186      | 0.106        | 0.141      | 0.026       | 0.084       | 0.186       | 0.020       |
| <i>NOTCH3</i>             | 0.195      | 0.055        | 0.046      | 0.003       | 0.131       | 0.183       | 0.063       |
| <i>DLL1</i>               | 0.049      | 0.132        | 0.049      | 0.101       | 0.143       | 0.203       | 0.143       |
| <b><i>DLL3</i></b>        | 0.160      | <b>0.321</b> | 0.080      | 0.002       | 0.059       | 0.174       | 0.086       |
| <i>DLL4</i>               | 0.076      | 0.072        | 0.112      | -0.005      | 0.124       | 0.185       | 0.110       |
| <i>JAG1</i>               | -0.004     | 0.164        | 0.165      | 0.147       | 0.138       | 0.156       | 0.113       |
| <i>JAG2</i>               | 0.099      | 0.105        | 0.150      | 0.051       | 0.051       | 0.114       | 0.107       |
| <i>MASH1</i>              | 0.030      | 0.113        | 0.008      | 0.016       | 0.091       | 0.114       | 0.075       |
| <i>HES1</i>               | 0.182      | 0.207        | 0.188      | 0.170       | 0.018       | 0.183       | 0.155       |
